# Supplementary material
Source: PubMed Central journal article supplement (PMC8088275)
Supplement: MCB.00590-20-s0001.pdf [file MCB.00590-20-s0001.pdf]

## **Rothmund-Thomson Syndrome-like RECQL4 truncating mutations cause a haploinsufficient low bone mass phenotype in mice**

Wilson Castillo-Tandazo<sup>1,2</sup>, Ann E Frazier<sup>3,4</sup>, Natalie A Sims<sup>1,2</sup>, Monique F Smeets<sup>1,2,\*</sup>  
& Carl R Walkley<sup>1,2,5,\*</sup>

<sup>1</sup>St. Vincent's Institute of Medical Research, Fitzroy, VIC 3065 Australia;

<sup>2</sup>Department of Medicine, St. Vincent's Hospital, The University of Melbourne, Fitzroy, VIC 3065 Australia;

<sup>3</sup>Murdoch Children's Research Institute, Royal Children's Hospital, Parkville, VIC 3052 Australia.

<sup>4</sup>Department of Paediatrics, University of Melbourne, Parkville, VIC 3052 Australia.

<sup>5</sup>Mary MacKillop Institute for Health Research, Australian Catholic University, Melbourne, VIC, 3000, Australia.

\*Contributed equally to this work

Correspondence should be addressed to:

Carl Walkley or Monique Smeets

St. Vincent's Institute

9 Princes St.

Fitzroy 3065 VIC

Australia

T: +61-3-9231-2480

Email: cwalkley@svi.edu.au; msmeets@svi.edu.au

ORCID Identifiers:

Wilson Castillo-Tandazo: 0000-0002-3202-8185

Ann Frazier: 0000-0002-6491-3437

Natalie Sims: 0000-0003-1421-8468

Monique Smeets: 0000-0001-6027-4108

Carl Walkley: 0000-0002-4784-9031

**Running Title:** RTS-like RECQL4 mutations cause low bone mass.

**Keywords:** Rothmund-Thomson Syndrome; RECQL4; RecQ; osteoporosis; osteosarcoma; mouse models.

**Abstract:** 200

**Number of Figures:** 5

**Conflict of Interest Statement:** All authors declare no conflicts of interest.

## Supporting Information

**S1 Fig. Genotyping of point mutant alleles** (A) Genomic DNA PCR plus MspI digest of *Recql4*<sup>+/+</sup> and *Recql4*<sup>G522Efs/+</sup>. Two independent mice per genotype. (B) KASP genotyping of *Recql4*<sup>+/+</sup> and *Recql4*<sup>R347X/+</sup>. HEX positive represents the R347X allele; FAM positive represents wild type allele. Two independent mice per genotype.

**S2 Fig. RECQL4 does not localize with mitochondria and truncating RECQL4 mutations do not affect mitochondrial respiration.** (A) Localization of mCherry (red) fused mouse RECQL4 and EGFP (green) fused human RECQL4 in Kusa4b10 cells. In the same cell lines, mitochondrial localization was determined by staining with Mitochondrial Staining Solution (MitoBlue, 1:500 diluted in HHBS). Images were colorized and merged. (B-E) Seahorse XF24-3 instrument analysis of oxygen consumption rate (OCR) as a reflection of mitochondrial respiration in HoxB8 immortalized *R26-CreER<sup>T2</sup>* myeloid cells after tamoxifen-mediated *Recql4* deletion (day 4 after tamoxifen addition) in the following cell lines: (B)  $\Delta$ /+; (C)  $\Delta$ /K525A; (D)  $\Delta$ /G522Efs; (E)  $\Delta$ /R347X. Dotted lines represent isogenic controls, not treated with tamoxifen. Data expressed as mean  $\pm$  SEM. No statistical significance achieved between the tamoxifen-treated and non-treated groups. The experiment was performed using triplicate wells and was independently executed two times using the same cell lines.

**S3 Fig. The reduced size of the heterozygous *Recql4* mutants is not a result of a change in fat to lean mass ratio.** Echo-MRI analysis of fat and lean percentage at ten weeks of age from males *Recql4*<sup>+/+</sup>, *Recql4*<sup>G522Efs/+</sup>, and *Recql4*<sup>R347X/+</sup> mice.

**S4 Fig. Micro-CT analysis.** Micro-CT measurements of germline 10-week old males *Recql4*<sup>+/+</sup>, *Recql4*<sup>K525A/K525A</sup>, *Recql4*<sup>G522Efs/+</sup>, and *Recql4*<sup>R347X/+</sup> mice: (A) Bone volume.

(B) Cortical area. (C) Marrow area. Micro-CT measurements of 10-week old males *Osx-Cre Recq14<sup>fl/+</sup>*, *Osx-Cre Recq14<sup>fl/K525A</sup>*, *Osx-Cre Recq14<sup>fl/G522Efs</sup>*, and *Osx-Cre Recq14<sup>fl/R347X</sup>* mice: (D) Bone volume. (E) Cortical area. (F) Marrow Area. Data expressed as mean  $\pm$  SEM, Ordinary one-way ANOVA. \*P<0.05; \*\*P<0.01; \*\*\*P<0.001; \*\*\*\*P<0.0001; n $\geq$ 6 per genotype. Experiments were independently executed on separate cohorts, with results pooled for presentation. K=K525A; G=G522Efs; R=R347X.

**S5 Fig. Heterozygous *Recq14* truncating mutations mildly affect myeloid progenitor populations.** (A) Total leukocyte counts. (B) Hematopoietic stem cells (HSC) and primitive progenitors based on Lin-c-kit+Sca-1+CD105/CD150 staining per femur. (C) Pre-GM and GMP populations per femur. (D) HSC and primitive progenitors based on Lin-c-kit+Sca-1+CD34/Flt3 staining per femur. (E) Numbers of myelo-erythroid progenitors (MEP) per femur. (F) Erythroid (Pre-CFU-E, CFU-E) and megakaryocyte progenitor (MkP) frequency in the bone marrow and representative FACS plot. (G) Numbers of granulocytes and macrophages per femur. Data expressed as mean  $\pm$  SEM, ordinary one-way ANOVA. \*P<0.05; \*\*P<0.01; \*\*\*P<0.001. Experiments were independently executed on separate cohorts, with results pooled for presentation. +/+ = wild type, n=5; G=G522Efs, n=10; R=R347X, n=8; G/K=G522Efs/K525A, n=9; R/K=R347X/K525A, n=9.

**S6 Fig. Effective deletion of *Recq14* floxed allele in murine mutants.** (A) Genomic PCR from Hoxb8 immortalized *R26-CreER<sup>T2</sup> Recq14<sup>fl/+</sup>*, *R26-CreER<sup>T2</sup> Recq14<sup>fl/K525A</sup>*, *R26-CreER<sup>T2</sup> Recq14<sup>fl/G522Efs</sup>*, and *R26-CreER<sup>T2</sup> Recq14<sup>fl/R347X</sup>* after addition of tamoxifen (400nM/mL) for 14 days demonstrating efficient gene deletion. True wild type (+/+) was used as control. (B-E) Independent replicate of proliferation curves of HoxB8 immortalized *R26-CreER<sup>T2</sup>* myeloid cells without (fl) and with ( $\Delta$ ) tamoxifen-

mediated *Recq14* deletion in the following cell lines: (B) fl/+; (C) fl/K525A; (D) fl/G522Efs; (E) fl/R347X. Related to data in Figure 5A-5D.

**S7 Fig. Effective deletion of *Recq14* floxed alleles in cells expressing human constructs.** Genomic PCR from Hoxb8 immortalized *R26-CreER<sup>T2</sup> Recq14<sup>fl/f</sup>* cells expressing: (A) empty vector (control); or EGFP fused (B) wild type RECQL4; (C) R807Pfs; (D) Q757X; (E) L638P; (F) K508A; (G) C525Afs; (H) R350Gfs. Efficient gene deletion was achieved after the addition of tamoxifen (400nM/mL) for the indicated number of days.

**S8 Fig. Protein expression of human constructs.** (A) Western blot from Kusa4b10 cells expressing EGFP fused RECQL4 wild type, K508A, R807Pfs, Q757X, L638P, C525Afs, and R350Gfs. Cells probed with anti-human/mouse RECQL4 (clone 3B1; top). The same blot re-probed with anti-Actin (bottom). (B) Expected protein product sizes.

**S9 Fig. Uncropped westerns for Figure 1D and Figure 1E.**

**S1 Table. Tumors observed in mutant mice.** List of tumors found during autopsy.

**S2 Table. FACS Antibodies.** List of antibodies used for flow cytometry in this study.

**A.**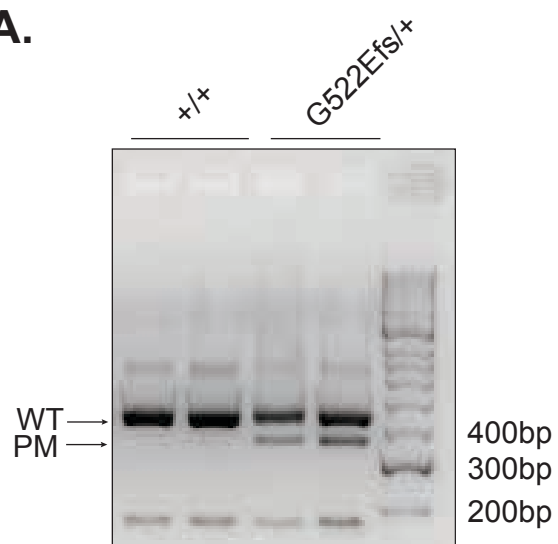**B.**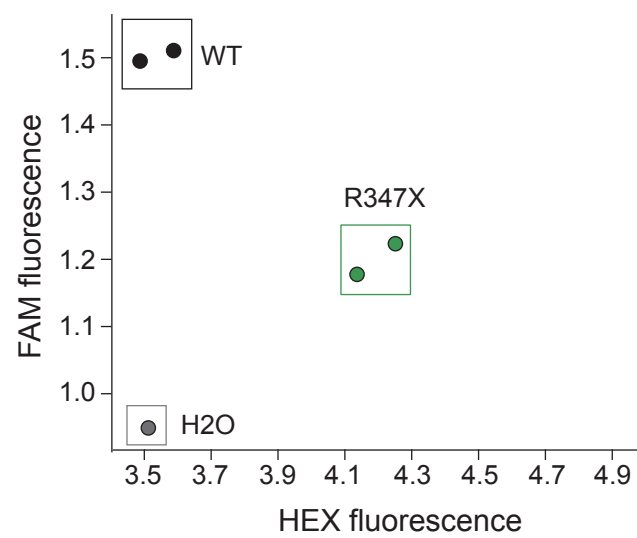

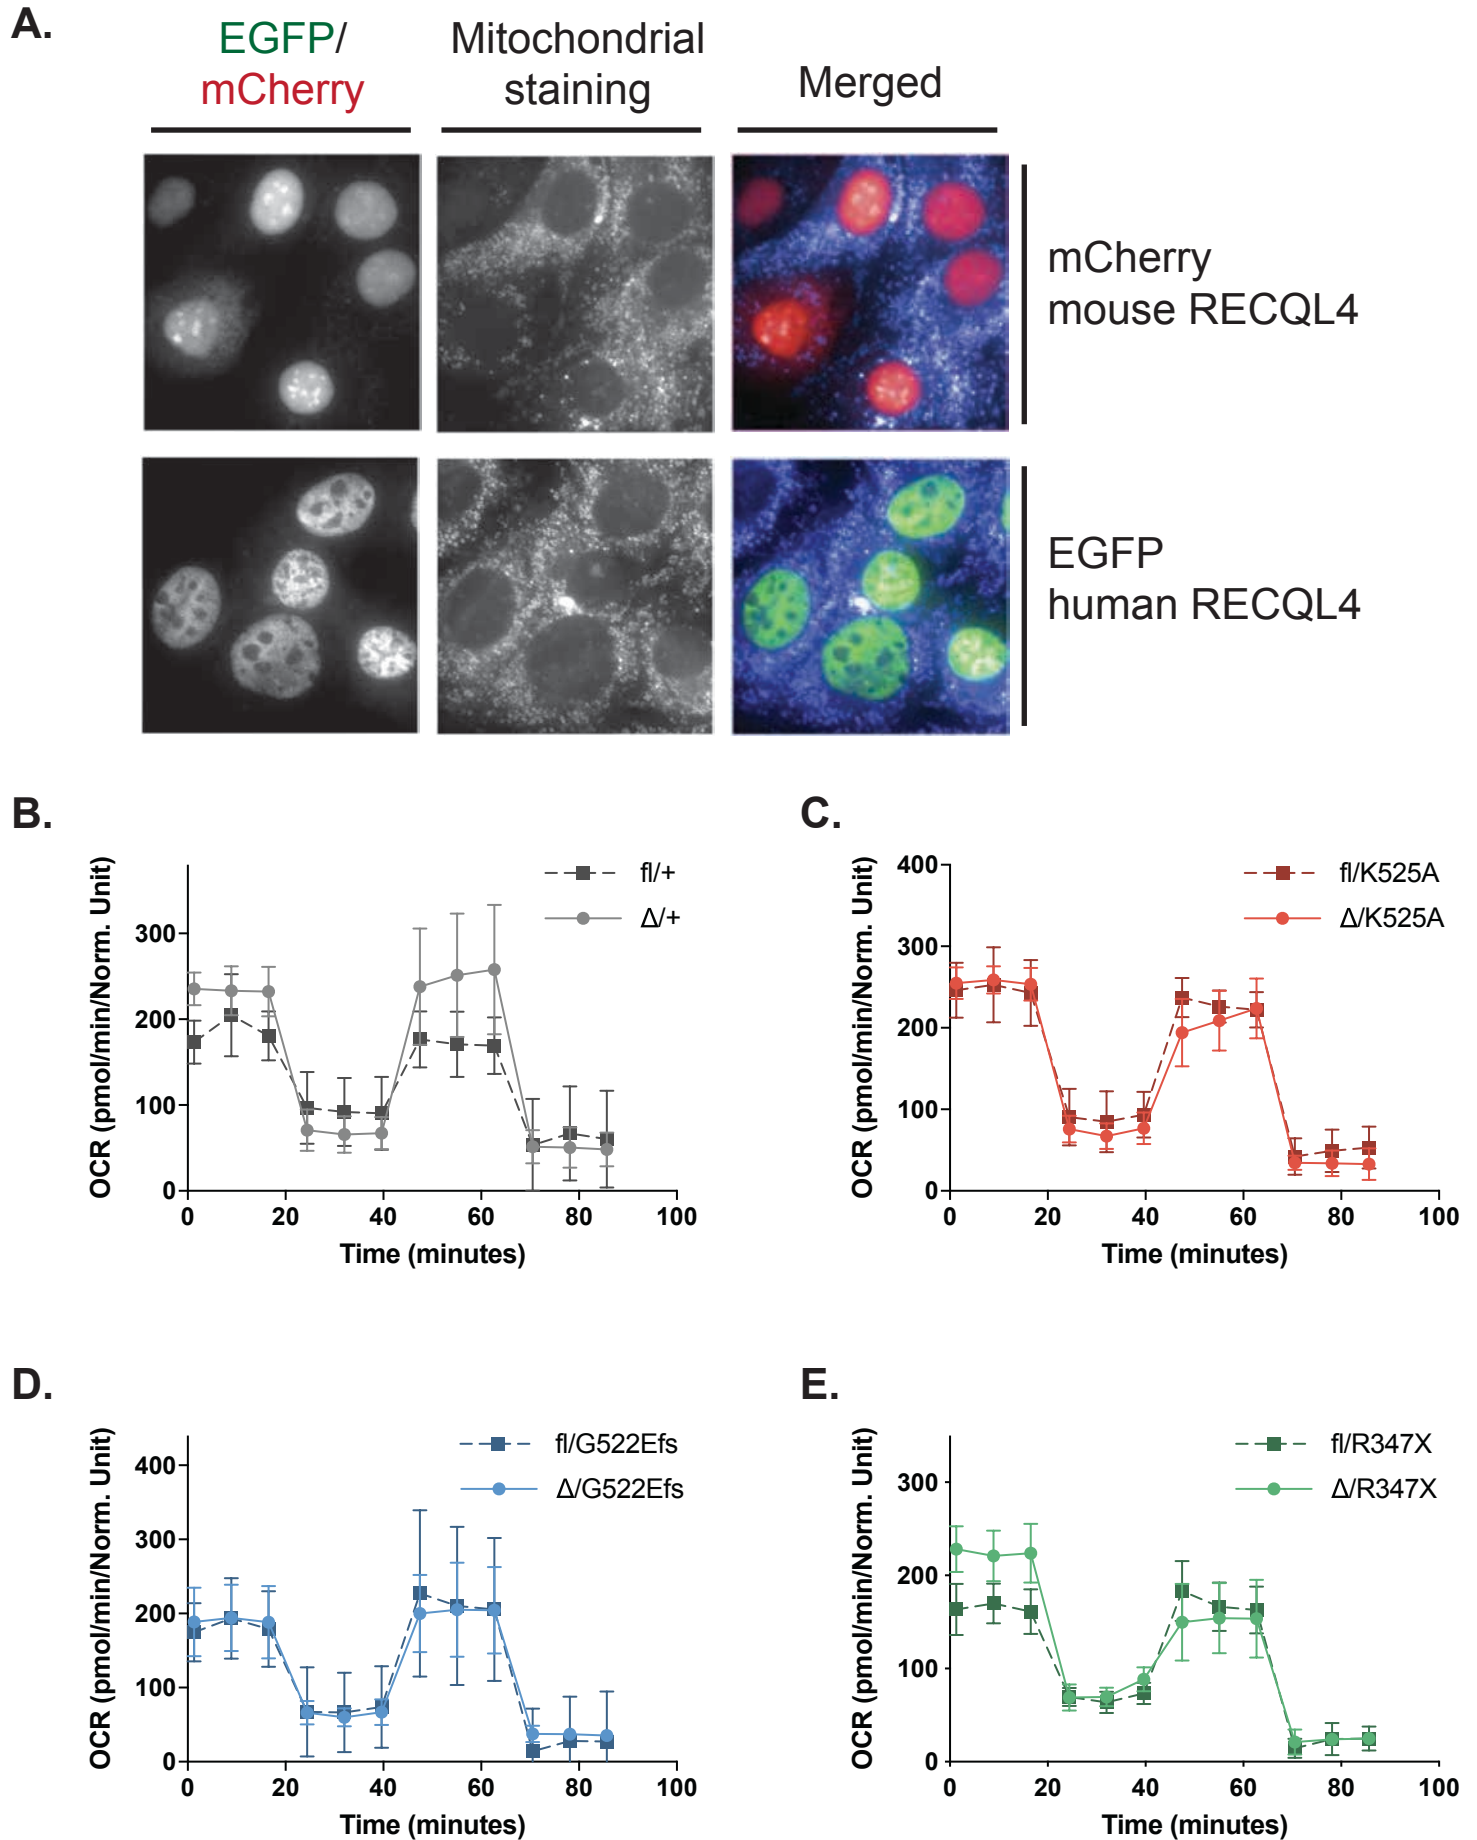

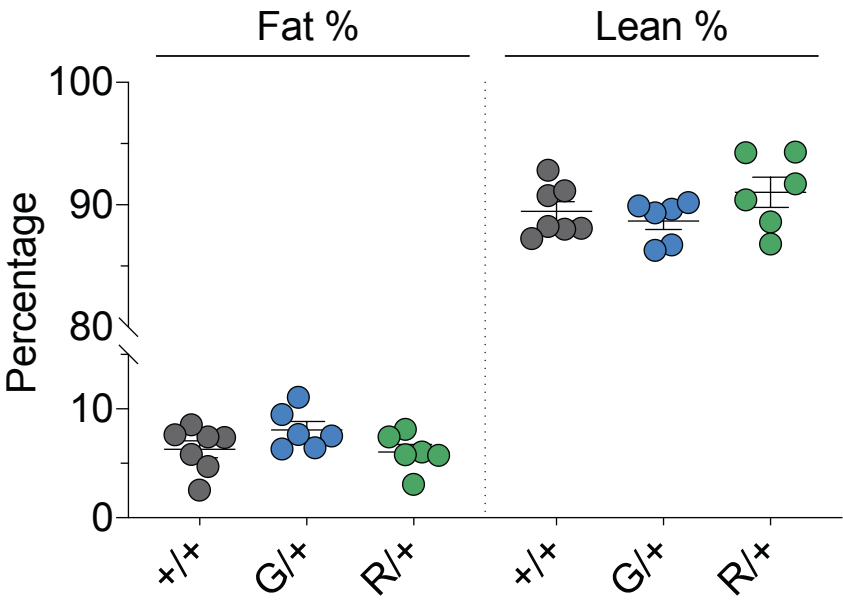

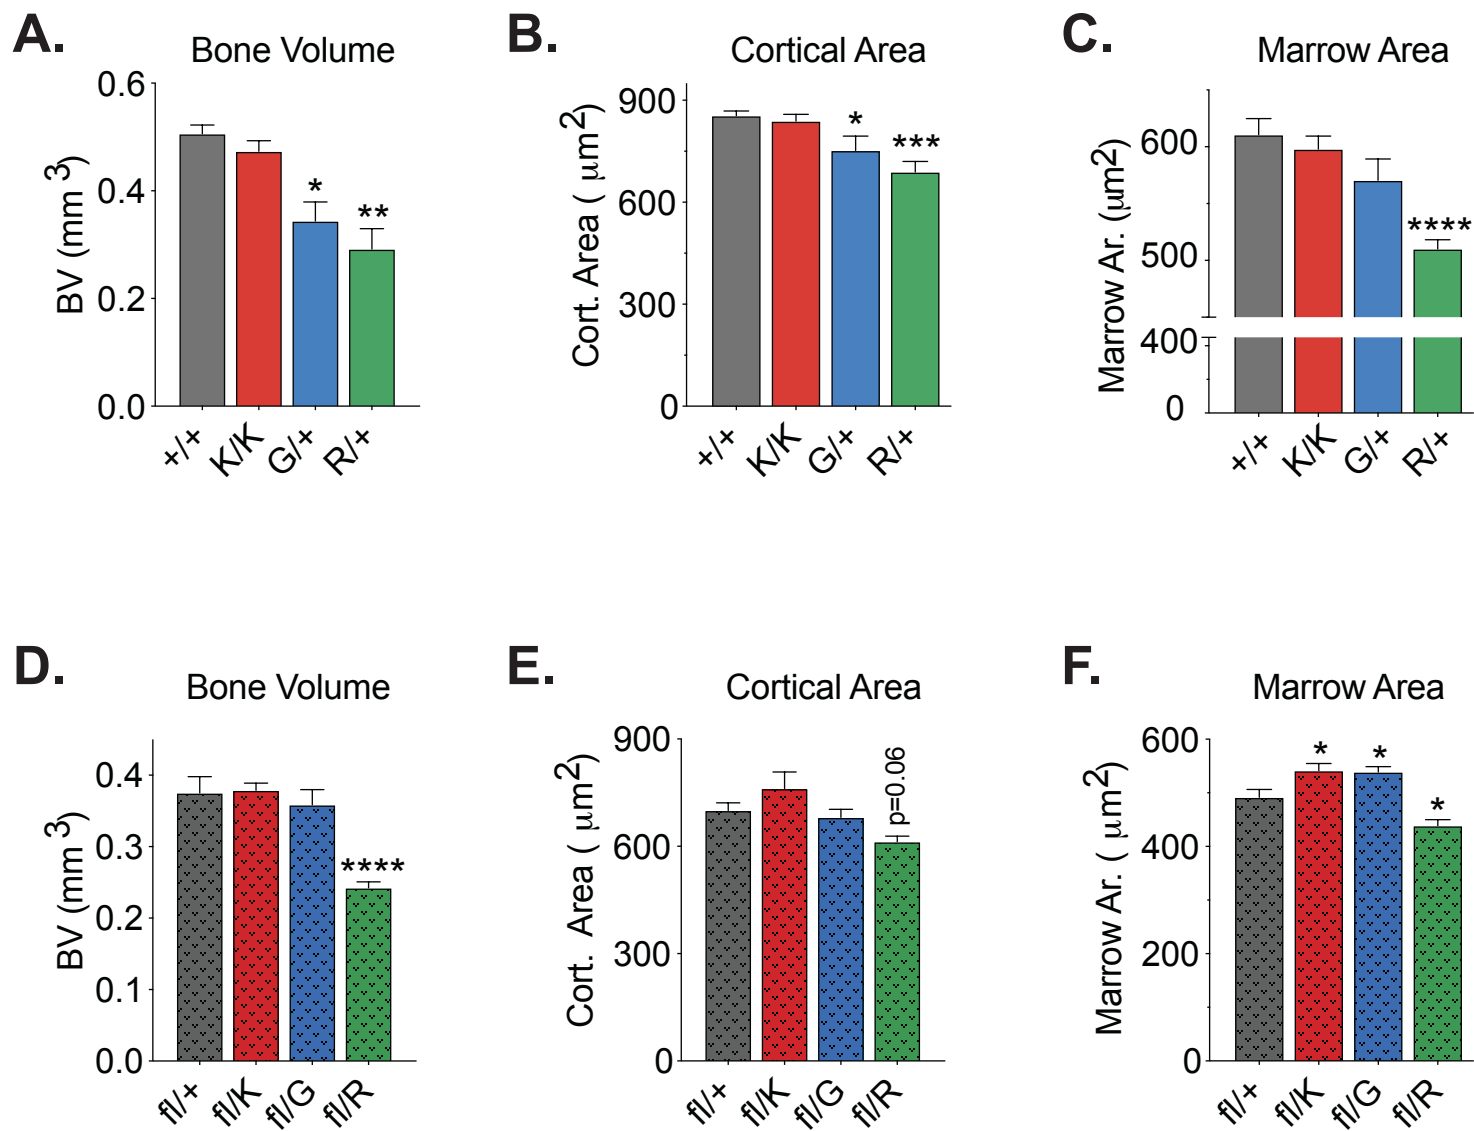



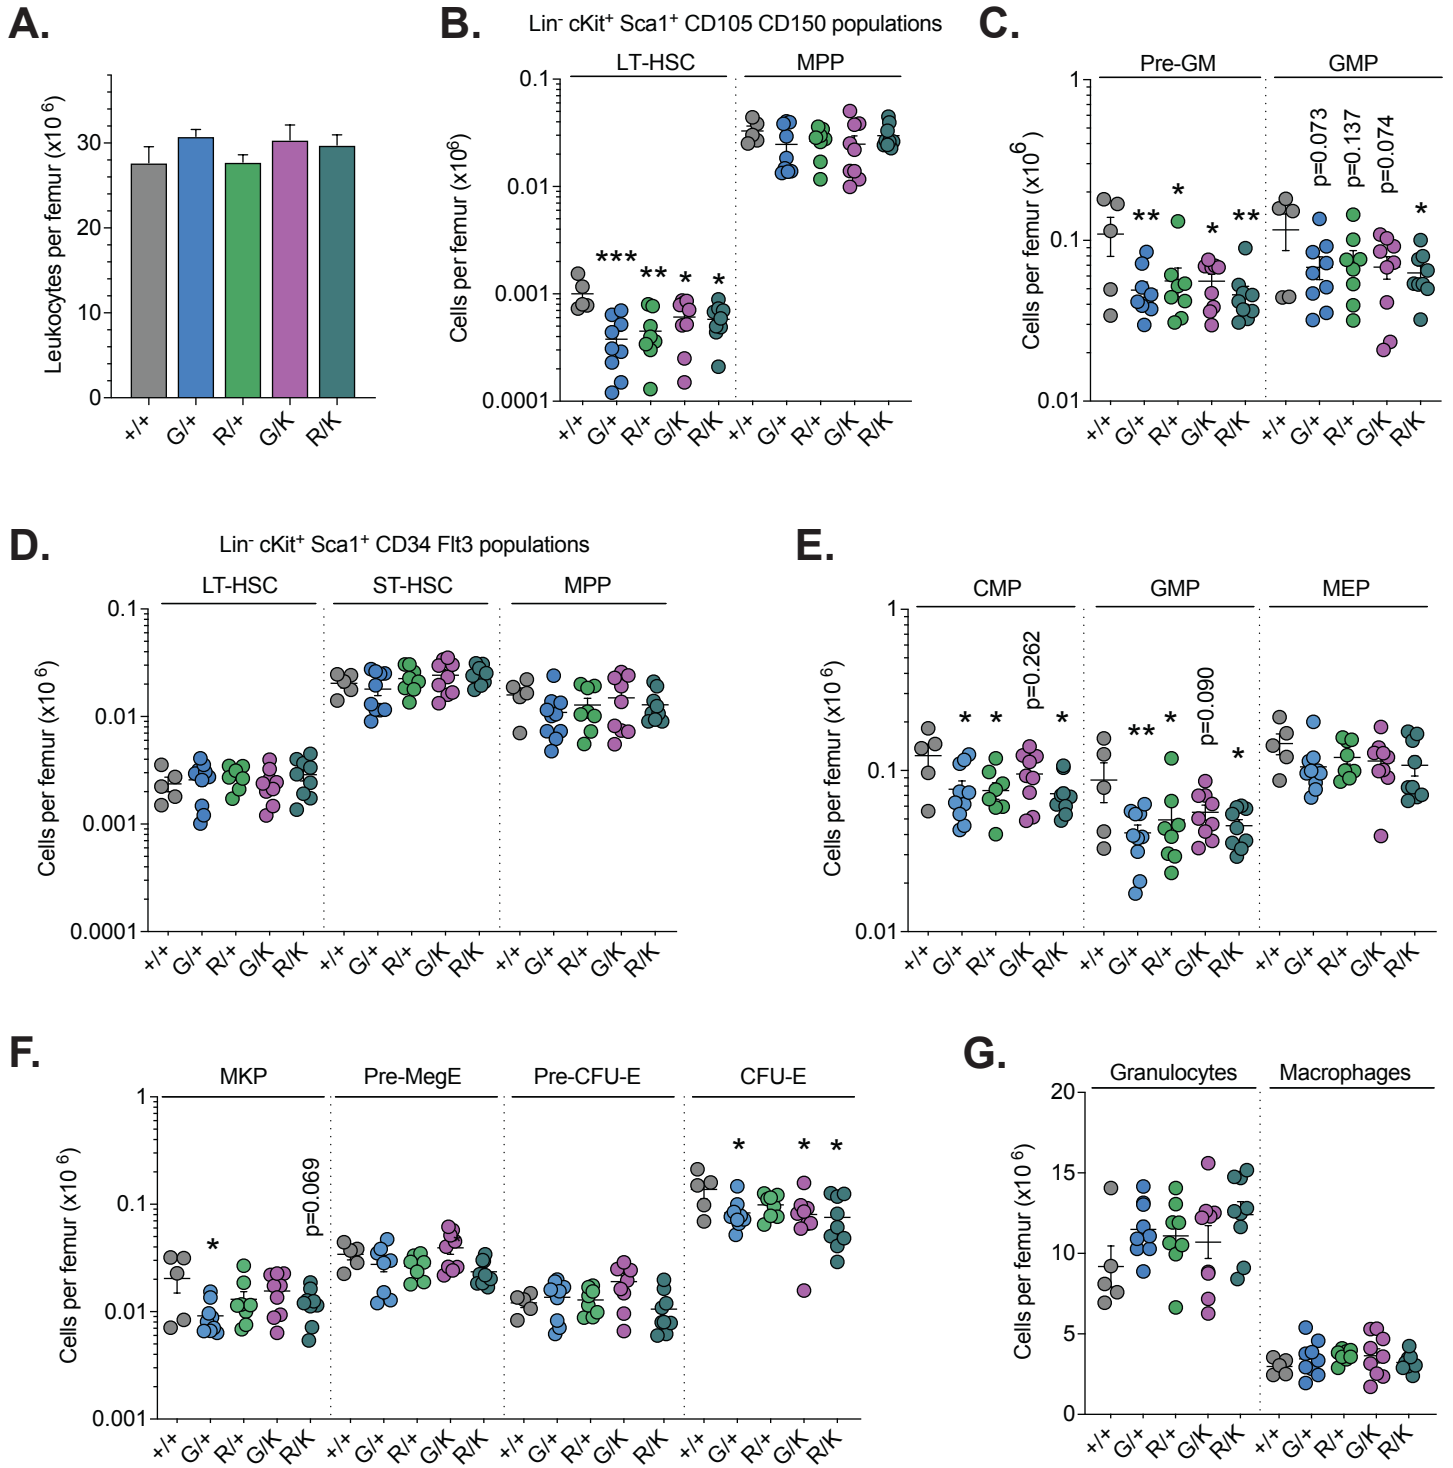

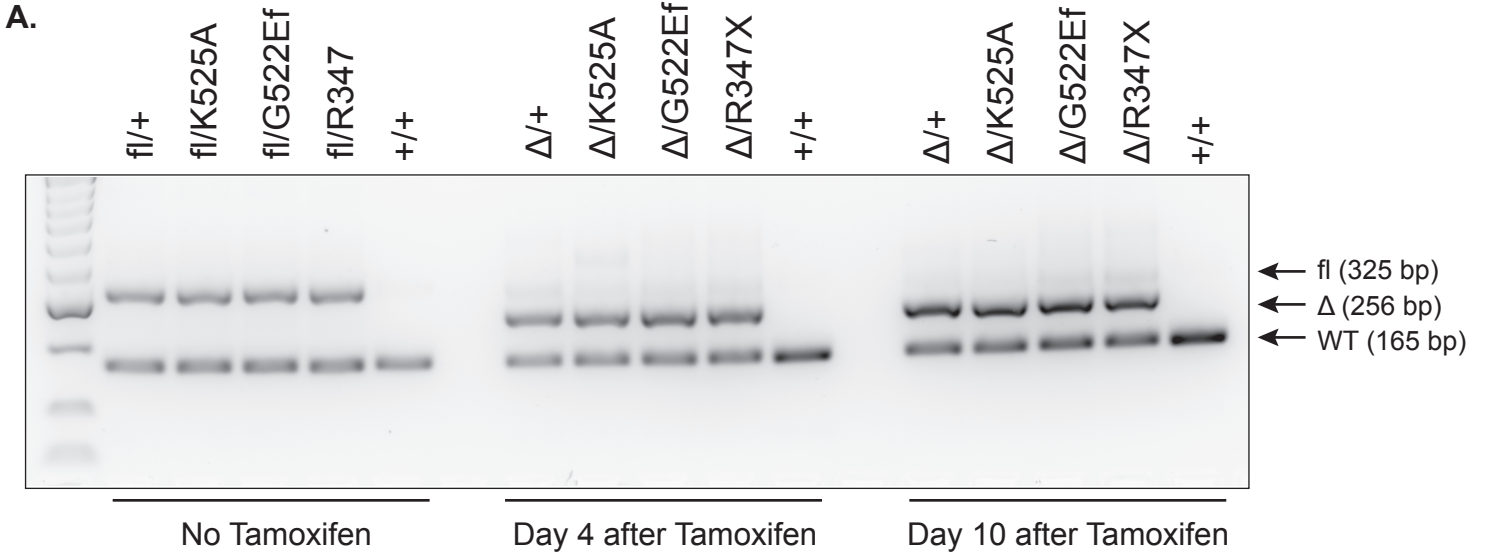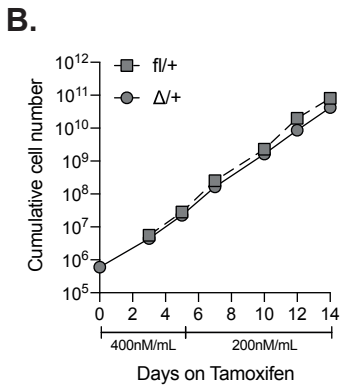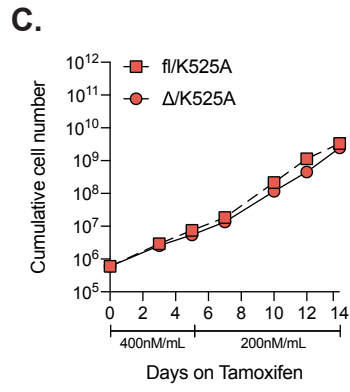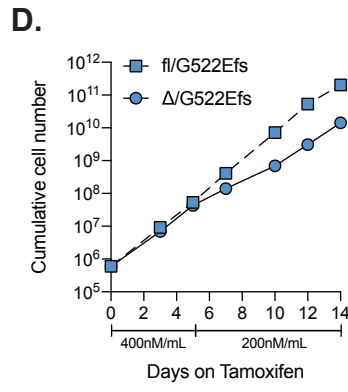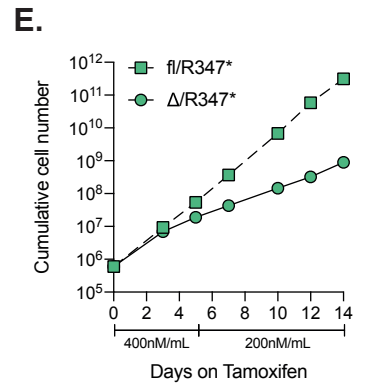

**A.** Empty vector (control)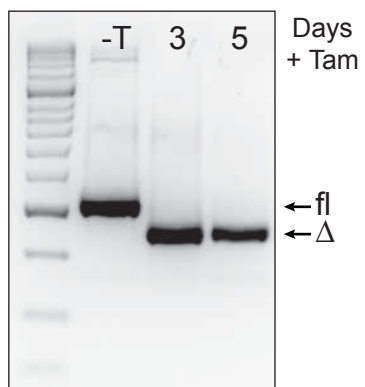**B.** Wild type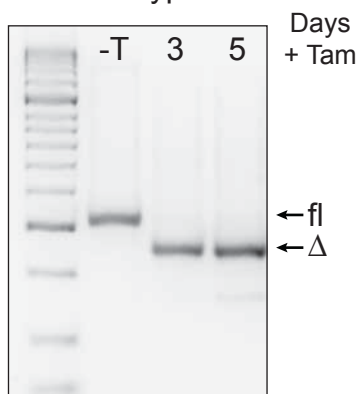**C.** R807Pfs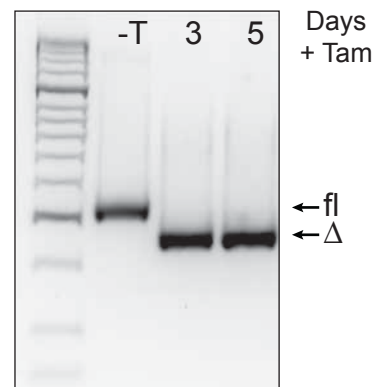**D.** Q757X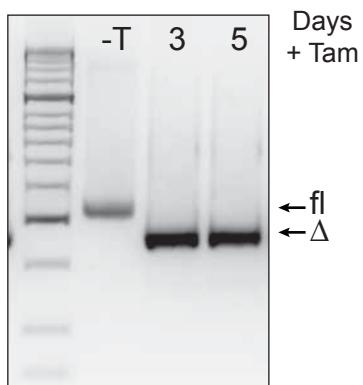**E.** L638P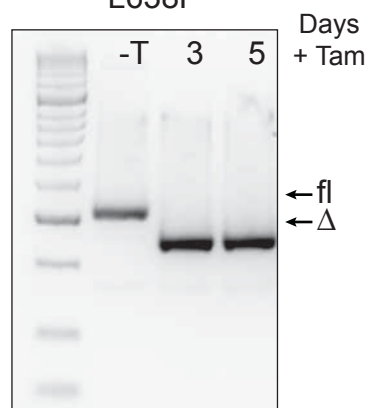**F.** K508A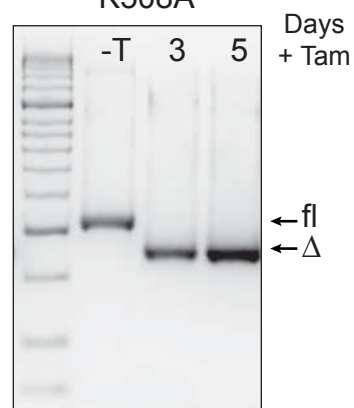**G.** C525Afs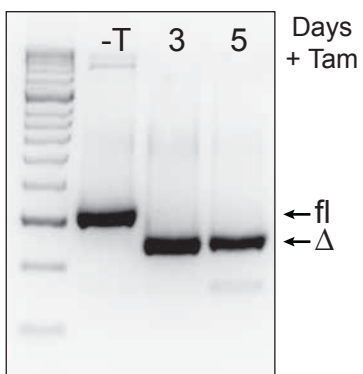**H.** R350Gfs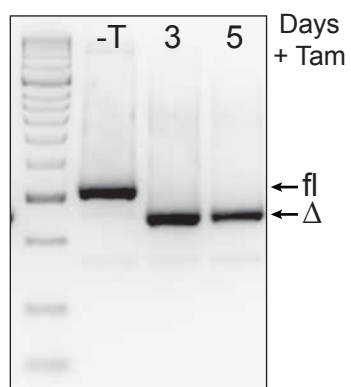

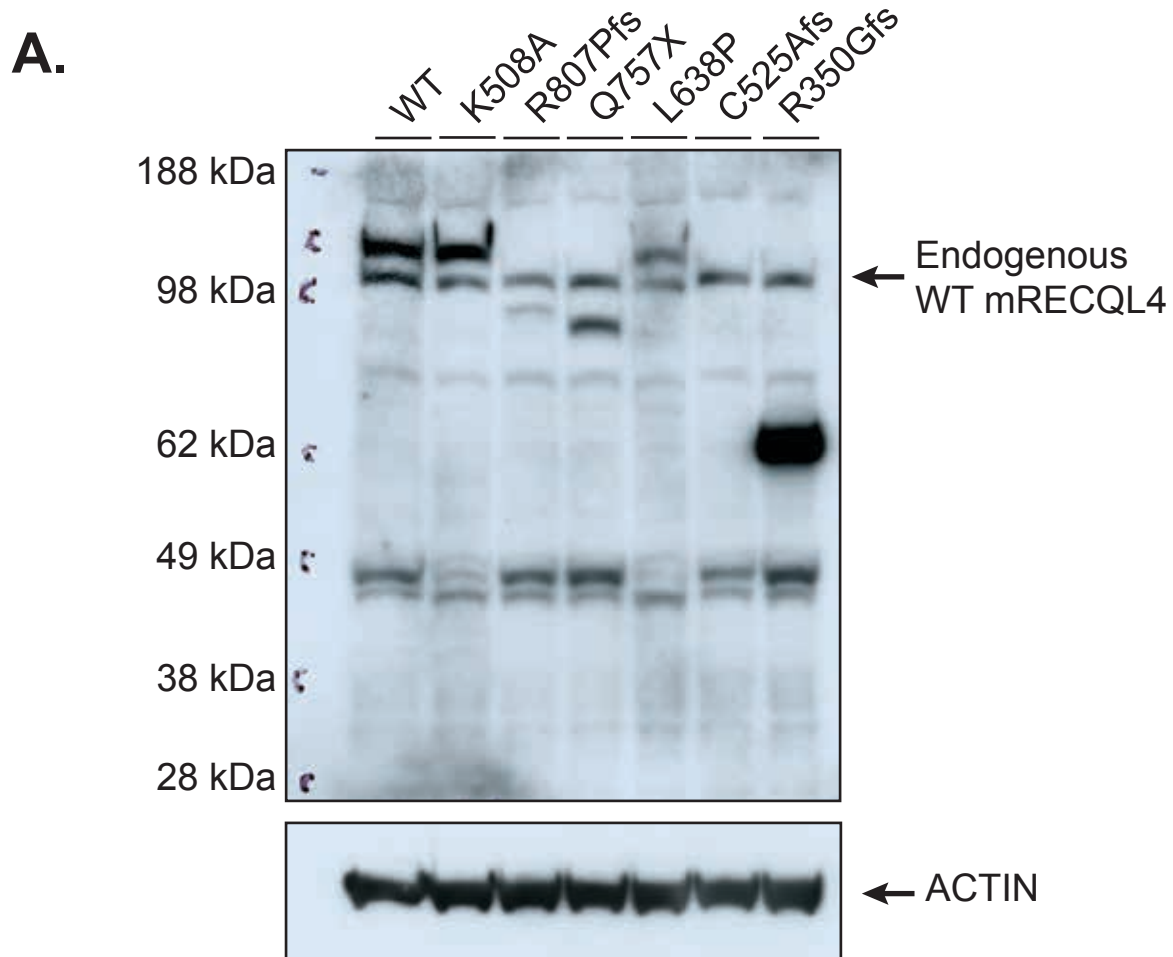

**B.**

| Human constructs      | Expected protein size (kDa) |
|-----------------------|-----------------------------|
| Endogenous mRECQL4 WT | 135                         |
| EGFP hRECQL4 WT       | 161.8                       |
| EGFP hRECQL4 K508A    | 161.8                       |
| EGFP hRECQL4 R807Pfs  | 120.1                       |
| EGFP hRECQL4 Q757X    | 110.9                       |
| EGFP hRECQL4 L638P    | 161.8                       |
| EGFP hRECQL4 C525Afs  | 89.3                        |
| EGFP hRECQL4 R350Gfs  | 68.3                        |

D.

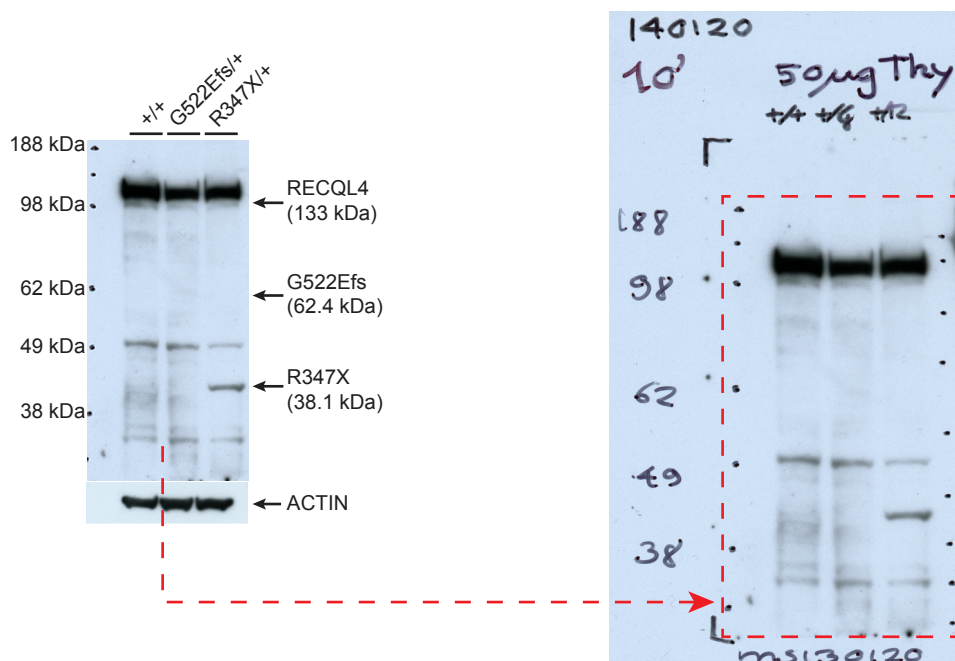

E.

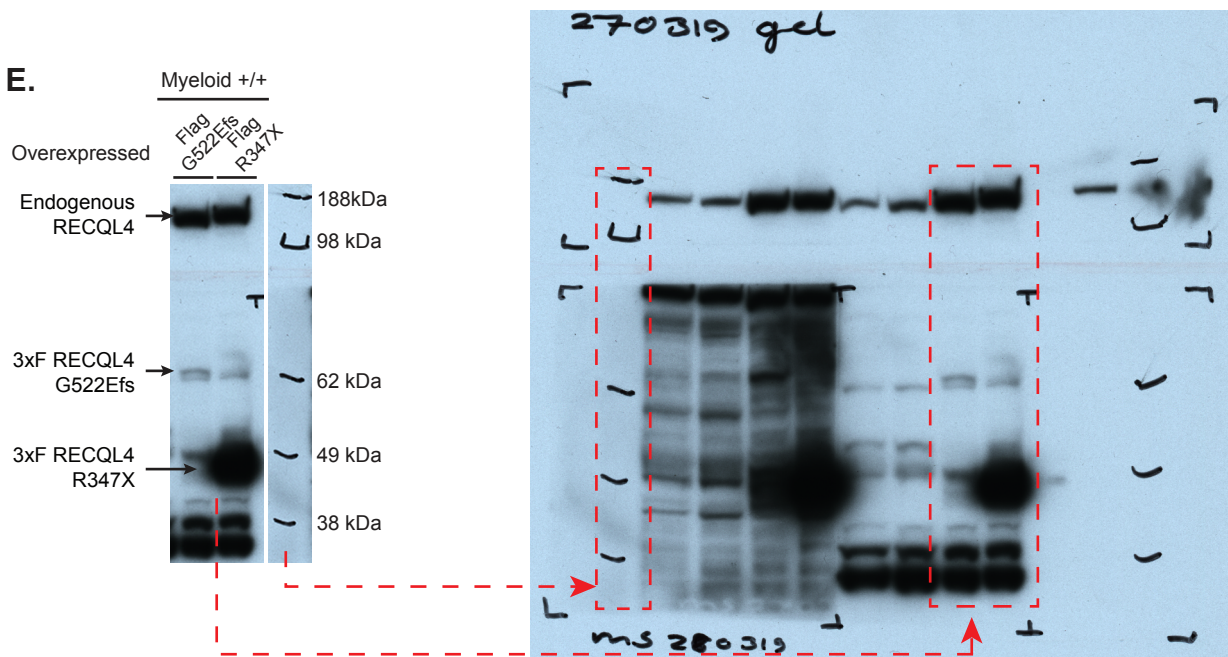

**S1 Table. Tumors observed in mutant mice**

| <b>Tumor type</b>    | <b>Recql4<sup>+/+</sup></b> | <b>Recql4<sup>K525A/+</sup></b> | <b>Recql4<sup>K525A/K525A</sup></b> | <b>Recql4<sup>G522/K525A</sup></b> | <b>Recql4<sup>R347X/K525A</sup></b> |
|----------------------|-----------------------------|---------------------------------|-------------------------------------|------------------------------------|-------------------------------------|
| Intestinal tumor     | 1                           | 3                               | 1                                   | 2                                  |                                     |
| Thymus tumor         | 2                           |                                 | 2                                   |                                    | 1                                   |
| Hepatic tumor        | 2                           | 3                               | 2                                   | 2                                  | 2                                   |
| Lung tumor           | 1                           |                                 |                                     | 1                                  |                                     |
| Spleen tumor         |                             |                                 |                                     | 1                                  | 1                                   |
| Mammary gland tumour |                             |                                 | 1                                   |                                    |                                     |

**S2 Table. FACS Antibodies (anti-mouse)**

| <b>Antibody (clone)</b> | <b>Conjugate</b> | <b>Catalogue #</b> | <b>Company</b>                                    |
|-------------------------|------------------|--------------------|---------------------------------------------------|
| Ter119 (TER-119)        | PE               | 12-5921-83         | Life Technologies Australia Pty Ltd/Thermo Fisher |
| CD71 (RI7 217.1.4)      | APC              | 17-0711-82         | Life Technologies Australia Pty Ltd/Thermo Fisher |
| B220/CD45R (RA3-6B2)    | APC              | 17-0452-83         | Life Technologies Australia Pty Ltd/Thermo Fisher |
| IgM (II/41)             | Biotin           | 13-5790-82         | Life Technologies Australia Pty Ltd/Thermo Fisher |
| CD43 (S7)               | PE               | 553271             | BD Pharmingen                                     |
| CD19 (1D3)              | PerCP-Cy5.5      | 45-0193-82         | Life Technologies Australia Pty Ltd/Thermo Fisher |
| Mac1/CD11b (M1/70)      | PE               | 12-0112-83         | Life Technologies Australia Pty Ltd/Thermo Fisher |
| Gr-1/Ly6G (RB6-8C5)     | PE-Cy7           | 25-5931-82         | Life Technologies Australia Pty Ltd/Thermo Fisher |
| F4/80 (BM8.1)           | APC              | 20-4801-U100       | Tonbo Biosciences                                 |
| CD4 (RM4-5)             | eFluor-450       | 48-0042-82         | Life Technologies Australia Pty Ltd/Thermo Fisher |
| CD8a/Ly-2 (53-6.7)      | APC-eFluor 780   | 47-0081-82         | Life Technologies Australia Pty Ltd/Thermo Fisher |
| TCRb (H57-597)          | PE               | 12-5961-83         | Life Technologies Australia Pty Ltd/Thermo Fisher |
| CD25 (PC61.5)           | PE               | 12-0251-83         | Life Technologies Australia Pty Ltd/Thermo Fisher |
| CD44 (IM7)              | APC              | 17-0441-83         | Life Technologies Australia Pty Ltd/Thermo Fisher |
| Sca-1 (D7)              | APC              | 17-5981-82         | Life Technologies Australia Pty Ltd/Thermo Fisher |
| c-Kit/CD117 (2B8)       | APC-eFluor-780   | 47-1171-82         | Life Technologies Australia Pty Ltd/Thermo Fisher |
| CD34 (RAM34)            | eFluor-660       | 50-0341-82         | Life Technologies Australia Pty Ltd/Thermo Fisher |
| CD135/Fit2/Fit3 (A2F10) | PE               | 12-1351-82         | Life Technologies Australia Pty Ltd/Thermo Fisher |
| FcγR/CD16/32 (93)       | PerCP-Cy5.5      | 45-0161-82         | Life Technologies Australia Pty Ltd/Thermo Fisher |
| CD41 (MWRReg30)         | eFluor-450       | 48-0411-82         | Life Technologies Australia Pty Ltd/Thermo Fisher |
| CD105 (MJ7/18)          | PE-Cy7           | 120409             | Biolegend                                         |
| CD150 (TC15-12F12.2)    | PE               | 115904             | Biolegend                                         |
| Streptavidin            | BV 605           | 563260             | BD Pharmingen                                     |
